# Supplementary material for: Pyridinic and pyrrolic nitrogen-rich ordered mesoporous carbon for efficient oxygen reduction in microbial fuel cells
Source: Royal Society of Chemistry journal article supplement (doi:10.1039/c7ra00807d), 2017-01-01
Supplement: c7ra00807d1.pdf [file c7ra00807d1.pdf]

## Supplementary Information

### Pyridinic and pyrrolic nitrogen-rich ordered mesoporous carbon for efficient oxygen reduction in microbial fuel cells

Leiyu Feng,<sup>a,b</sup> Xutao Chen,<sup>a</sup> Yue Cao,<sup>a</sup> Yunzhi Chen,<sup>a</sup> Feng Wang,<sup>a</sup> Yinguang Chen,<sup>a,\*</sup> Yin Liu<sup>c</sup>

<sup>a</sup> State Key Laboratory of Pollution Control and Resources Reuse, School of Environmental Science and Engineering, Tongji University, Shanghai 200092, People's Republic of China

<sup>b</sup> Research & Service Center for Environmental Industry, Yancheng 224051, Jiangsu Province, People's Republic of China

<sup>c</sup> Bohai Drilling Engineering Co., Ltd., China National Petroleum Corporation, Tinajin, 300457, People's Republic of China

\*Corresponding author E-mail: yg2chen@yahoo.com; tel: 86-21-65981263; fax: 86-21-65986313

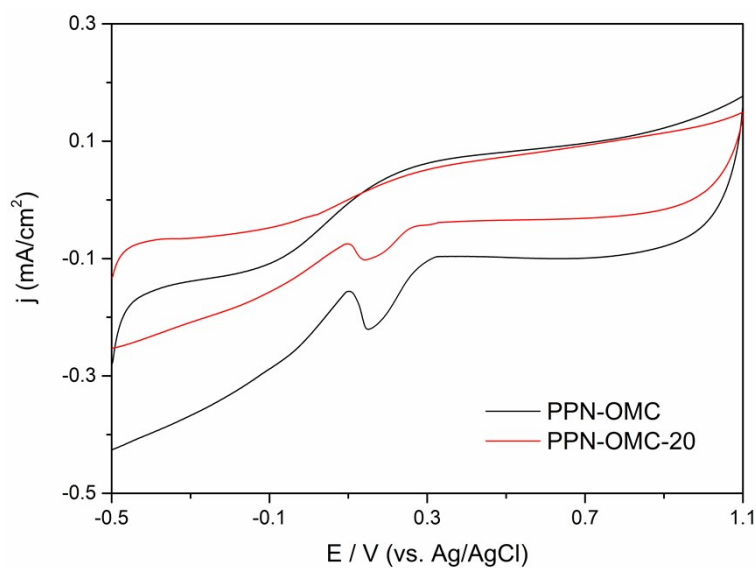

**Fig. S1.** CVs of ORR on PPN-OMC and PPN-OMC-20 electrodes

Therefore, the nitrogen-doped ordered mesoporous carbon with lower nitrogen content by using the same method except that the amount of urea was reduced to 20 mg (named as PPN-OMC-20). The nitrogen content in PPN-OMC-20 catalyst was measured to be 6.6%, and the content of pyridinic and pyrrolic N was 38.9% and 35.3%. Further comparison of ORR CVs from PPN-OMC/GC and PPN-OMC-20/GC found that the position and intensity of PPN-OMC were greater, demonstrating that PPN-OMC possessed a better electrocatalytic activity for ORR in the neutral electrolyte solution. It is clear that higher nitrogen content in the certain range with high pyridinic and pyrrolic ratios could enhance the electrocatalytic activity of mesoporous carbon materials.

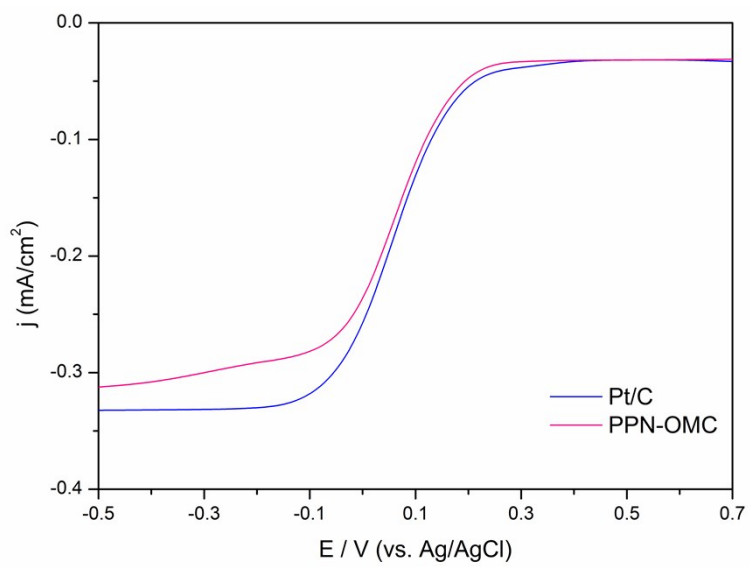

**Fig. S2.** LSV of PPN-OMC and Pt/C on RDE at 1200 revolutions per minute

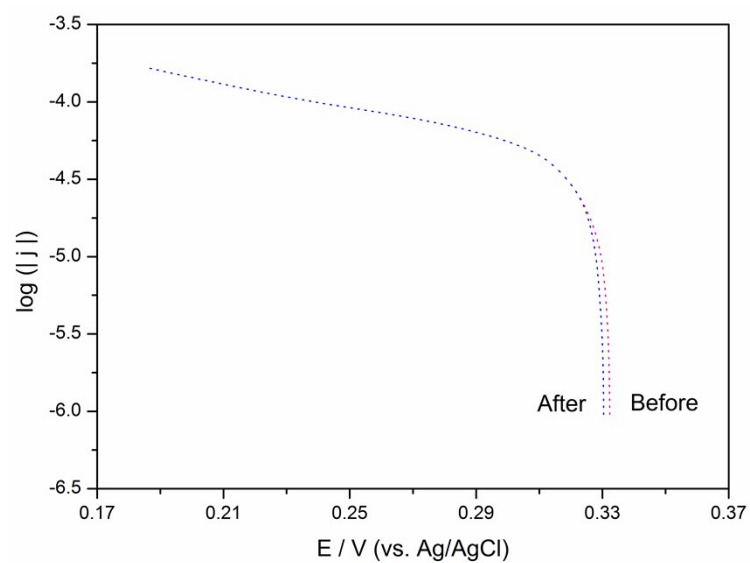

**Fig. S3.** Tafel plots of PPN-OMC electrode in  $O_2$ -saturated neutral phosphate buffer solution. The plots show the ORR performance of PPN-OMC electrode before and after addition of 6 mM sodium formate to the electrolyte solution. The galvanodynamic experiments were performed at a scan rate of  $10^{-7}$  A/s.

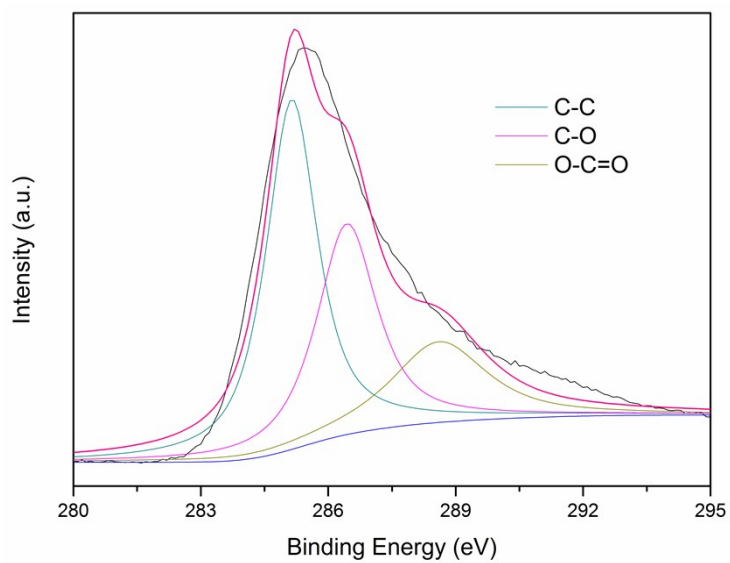

**Fig. S4.** High-resolution C 1s XPS spectrum of PPN-OMC material

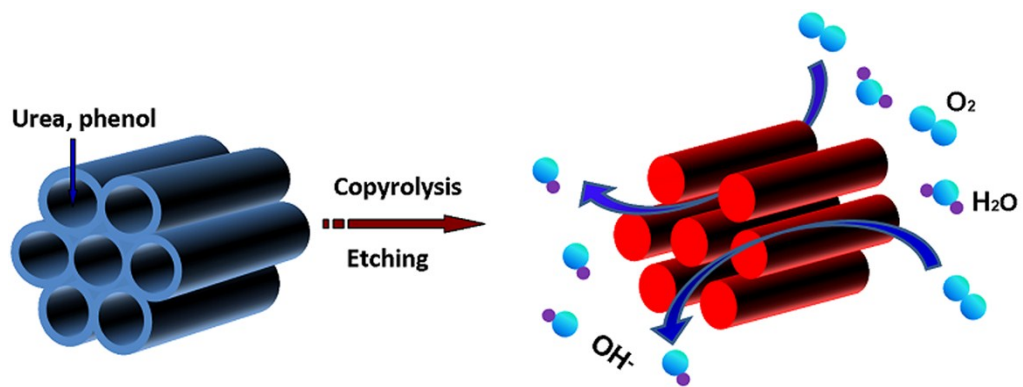

**Fig. S5.** Schematic illustration of PPN-OMC fabrication
